# Supplementary material for: Trends in Hospitalized Acute Myocardial Infarction Patients with Heart Failure in Korea at 1998 and 2008
Source: PubMed Central journal article supplement — J Korean Med Sci. 2014 Apr 1;29(4):544–9. doi: 10.3346/jkms.2014.29.4.544 (PMC3991798; doi:10.3346/jkms.2014.29.4.544), 2014-04-01
Supplement: jkms-29-544-s001.pdf [file jkms-29-544-s001.pdf]

**Supplementary Table 1.** Propensity score matching analysis for in-hospital mortality in AMI patients with HF between 1998 and 2008

| Variables                      | 1998 (n = 128) | 2008 (n = 128) | P value |
|--------------------------------|----------------|----------------|---------|
| Gender                         |                |                |         |
| Male                           | 88 (68.75)     | 90 (70.31)     | 0.763   |
| Female                         | 40 (31.25)     | 38 (29.69)     |         |
| Age (yr)                       | 62.37 ± 12.54  | 62.73 ± 12.94  | 0.791   |
| STEMI, No. (%)                 |                |                |         |
| Yes                            | 88 (68.75)     | 91 (71.09)     | 0.662   |
| No                             | 40 (31.25)     | 37 (28.91)     |         |
| Hypertension                   |                |                |         |
| Yes                            | 54 (42.19)     | 58 (45.31)     | 0.617   |
| No                             | 74 (57.81)     | 70 (54.69)     |         |
| Diabetes mellitus              |                |                |         |
| Yes                            | 41 (32.03)     | 42 (32.81)     | 0.898   |
| No                             | 87 (67.97)     | 86 (67.19)     |         |
| CVA                            |                |                |         |
| Yes                            | 11 (8.59)      | 11 (8.59)      | > 0.999 |
| No                             | 117 (91.41)    | 117 (91.41)    |         |
| Previous MI                    |                |                |         |
| Yes                            | 3 (2.34)       | 2 (1.56)       | > 0.999 |
| No                             | 125 (97.66)    | 126 (98.44)    |         |
| Dyslipidemia                   |                |                |         |
| Yes                            | 20 (15.63)     | 19 (14.84)     | > 0.999 |
| No                             | 108 (84.38)    | 109 (85.16)    |         |
| Smoking                        |                |                |         |
| Yes                            | 63 (49.22)     | 64 (50.00)     | 0.891   |
| No                             | 65 (50.78)     | 64 (50.00)     |         |
| Family history                 |                |                |         |
| Yes                            | 18 (14.06)     | 21 (16.41)     | 0.728   |
| No                             | 110 (85.94)    | 107 (83.59)    |         |
| SBP (mmHg)                     | 124.47 ± 27.72 | 127.43 ± 29.73 | 0.426   |
| Heart rate (/min)              | 82.31 ± 20.43  | 82.70 ± 20.56  | 0.877   |
| PCI                            |                |                |         |
| Yes                            | 79 (61.72)     | 82 (64.06)     | 0.668   |
| No                             | 49 (38.28)     | 46 (35.94)     |         |
| CABG                           |                |                |         |
| Yes                            | 13 (10.16)     | 13 (10.16)     | > 0.999 |
| No                             | 115 (89.84)    | 115 (89.84)    |         |
| Ventilator                     |                |                |         |
| Yes                            | 19 (14.84)     | 18 (14.06)     | > 0.999 |
| No                             | 109 (85.16)    | 110 (85.94)    |         |
| IABP                           |                |                |         |
| Yes                            | 15 (11.72)     | 17 (13.28)     | 0.845   |
| No                             | 113 (88.28)    | 111 (86.72)    |         |
| Inotropics                     |                |                |         |
| Yes                            | 33 (25.78)     | 33 (25.78)     | > 0.999 |
| No                             | 95 (74.22)     | 95 (74.22)     |         |
| ICU care duration (day)        | 6.13 ± 8.14    | 6.07 ± 10.84   | 0.960   |
| In-hospital mortality, No. (%) |                |                |         |
| Yes                            | 6 (4.69)       | 11 (8.59)      | 0.332   |
| No                             | 122 (95.31)    | 117 (91.41)    |         |

AMI, acute myocardial infarction; HF, heart failure; STEMI, ST elevation MI; CVA, cerebrovascular accident; MI, myocardial infarction; SBP, systolic blood pressure; PCI, percutaneous coronary intervention; CABG, coronary artery bypass graft; IABP, intra-aortic balloon pump; ICU, intensive care unit.
