# Supplementary material for: Trends in Hospitalized Acute Myocardial Infarction Patients with Heart Failure in Korea at 1998 and 2008
Source: PubMed Central journal article supplement — J Korean Med Sci. 2014 Apr 1;29(4):544–9. doi: 10.3346/jkms.2014.29.4.544 (PMC3991798; doi:10.3346/jkms.2014.29.4.544), 2014-04-01
Supplement: jkms-29-544-s002.pdf [file jkms-29-544-s002.pdf]

**Supplementary Table 2.** Propensity score matching analysis for in-hospital mortality in AMI patients with HF treated by PCI between 1998 and 2008

| Variables                      | 1998 (n = 71)  | 2008 (n = 71)  | P value |
|--------------------------------|----------------|----------------|---------|
| Gender                         |                |                |         |
| Male                           | 51 (71.83)     | 51 (71.83)     | > 0.999 |
| Female                         | 20 (28.17)     | 20 (28.17)     |         |
| Age (yr)                       | 60.23 ± 12.60  | 59.79 ± 12.87  | 0.813   |
| STEMI, No. (%)                 |                |                |         |
| Yes                            | 57 (80.28)     | 56 (78.87)     | > 0.999 |
| No                             | 14 (19.72)     | 15 (21.13)     |         |
| Hypertension                   |                |                |         |
| Yes                            | 29 (40.85)     | 33 (46.48)     | 0.505   |
| No                             | 42 (59.15)     | 38 (53.52)     |         |
| Diabetes mellitus              |                |                |         |
| Yes                            | 21 (29.58)     | 25 (35.21)     | 0.346   |
| No                             | 50 (70.42)     | 46 (64.79)     |         |
| CVA                            |                |                |         |
| Yes                            | 5 (7.04)       | 2 (2.82)       | 0.453   |
| No                             | 66 (92.96)     | 69 (97.18)     |         |
| Previous MI                    |                |                |         |
| Yes                            | 0 (0.00)       | 0 (0.00)       | > 0.999 |
| No                             | 71 (100.00)    | 71 (100.00)    |         |
| Dyslipidemia                   |                |                |         |
| Yes                            | 13 (18.31)     | 11 (15.49)     | 0.839   |
| No                             | 58 (81.69)     | 60 (84.51)     |         |
| Smoking                        |                |                |         |
| Yes                            | 36 (50.70)     | 35 (49.30)     | 0.866   |
| No                             | 35 (49.30)     | 36 (50.70)     |         |
| Family history                 |                |                |         |
| Yes                            | 12 (16.90)     | 10 (14.08)     | 0.832   |
| No                             | 59 (83.10)     | 61 (85.92)     |         |
| SBP (mmHg)                     | 126.54 ± 25.36 | 125.30 ± 29.36 | 0.790   |
| Heart rate (/min)              | 81.72 ± 18.63  | 80.44 ± 20.40  | 0.680   |
| Ventilator                     |                |                |         |
| Yes                            | 2 (2.82)       | 4 (5.63)       | 0.500   |
| No                             | 69 (97.18)     | 67 (94.37)     |         |
| IABP                           |                |                |         |
| Yes                            | 9 (12.68)      | 8 (11.27)      | > 0.999 |
| No                             | 62 (87.32)     | 63 (88.73)     |         |
| Inotropics                     |                |                |         |
| Yes                            | 14 (19.72)     | 16 (22.54)     | 0.832   |
| No                             | 57 (80.28)     | 55 (77.46)     |         |
| ICU care duration (day)        | 4.11 ± 2.88    | 4.77 ± 9.31    | 0.567   |
| In-hospital mortality, No. (%) |                |                |         |
| Yes                            | 1 (1.41)       | 3 (4.23)       | 0.500   |
| No                             | 70 (98.59)     | 68 (95.77)     |         |

AMI, acute myocardial infarction; HF, heart failure; PCI, percutaneous coronary intervention; STEMI, ST elevation MI; CVA, cerebrovascular accident; MI, myocardial infarction; SBP, systolic blood pressure; IABP, intra-aortic balloon pump; ICU, intensive care unit.
