# Supplementary material for: Trends in Hospitalized Acute Myocardial Infarction Patients with Heart Failure in Korea at 1998 and 2008
Source: PubMed Central journal article supplement — J Korean Med Sci. 2014 Apr 1;29(4):544–9. doi: 10.3346/jkms.2014.29.4.544 (PMC3991798; doi:10.3346/jkms.2014.29.4.544), 2014-04-01
Supplement: jkms-29-544-s003.pdf [file jkms-29-544-s003.pdf]

**Supplementary Table 3.** Propensity score matching analysis for in-hospital mortality in patients with STEMI with HF treated with PCI between 1998 and 2008

| Variables                      | 1998 (n = 38)  | 2008 (n = 38)  | P value |
|--------------------------------|----------------|----------------|---------|
| Gender                         |                |                |         |
| Male                           | 28 (73.68)     | 28 (73.68)     | > 0.999 |
| Female                         | 10 (26.32)     | 10 (26.32)     |         |
| Age (yr)                       | 61.29 ± 11.52  | 61.29 ± 13.64  | > 0.999 |
| Hypertension                   |                |                |         |
| Yes                            | 15 (39.47)     | 16 (42.11)     | 0.808   |
| No                             | 23 (60.53)     | 22 (57.89)     |         |
| Diabetes mellitus              |                |                |         |
| Yes                            | 7 (18.42)      | 10 (26.32)     | 0.607   |
| No                             | 31 (81.58)     | 28 (73.68)     |         |
| CVA                            |                |                |         |
| Yes                            | 3 (7.89)       | 3 (7.89)       | > 0.999 |
| No                             | 35 (92.11)     | 35 (92.11)     |         |
| Previous MI                    |                |                |         |
| Yes                            | 0 (0.00)       | 0 (0.00)       | > 0.999 |
| No                             | 38 (100.00)    | 38 (100.00)    |         |
| Dyslipidemia                   |                |                |         |
| Yes                            | 5 (13.16)      | 4 (10.53)      | > 0.999 |
| No                             | 33 (86.84)     | 34 (89.47)     |         |
| Smoking                        |                |                |         |
| Yes                            | 24 (63.16)     | 25 (65.79)     | > 0.999 |
| No                             | 14 (36.84)     | 13 (34.21)     |         |
| Family history                 |                |                |         |
| Yes                            | 6 (15.79)      | 7 (18.42)      | > 0.999 |
| No                             | 32 (84.21)     | 31 (81.58)     |         |
| SBP (mmHg)                     | 126.95 ± 29.39 | 120.18 ± 27.37 | 0.286   |
| Heart rate (/min)              | 80.03 ± 20.26  | 81.05 ± 25.46  | 0.842   |
| Ventilator                     |                |                |         |
| Yes                            | 6 (15.79)      | 5 (13.16)      | > 0.999 |
| No                             | 32 (84.21)     | 33 (86.84)     |         |
| IABP                           |                |                |         |
| Yes                            | 8 (21.05)      | 8 (21.05)      | > 0.999 |
| No                             | 30 (78.95)     | 30 (78.95)     |         |
| Inotropics                     |                |                |         |
| Yes                            | 11 (28.95)     | 14 (36.84)     | 0.549   |
| No                             | 27 (71.05)     | 24 (63.16)     |         |
| ICU care duration (day)        | 4.74 ± 3.77    | 4.32 ± 5.17    | 0.711   |
| In-hospital mortality, No. (%) |                |                |         |
| Yes                            | 2 (5.26)       | 3 (7.89)       | > 0.999 |
| No                             | 36 (94.74)     | 35 (92.11)     |         |

STEMI, ST elevation MI; HF, heart failure; PCI, percutaneous coronary intervention; CVA, cerebrovascular accident; MI, myocardial infarction; SBP, systolic blood pressure; IABP, intra-aortic balloon pump; ICU, intensive care unit.
